# Supplementary material for: Post-synthetic modifications of as-made zeolite frameworks near the structure-directing agents
Source: Royal Society of Chemistry journal article supplement (doi:10.1039/c4ta00656a), 2014-01-01
Supplement: c4ta00656a1.pdf [file c4ta00656a1.pdf]

## Post-Synthetic Modifications of As-Made Zeolite Frameworks Near The Structure Directing Agents

Soumya Senapati, Julia Zimdars, Jinjun Ren and Hubert Koller\*

# Supporting Information

Institute of Physical Chemistry and Graduate School of Chemistry  
Corrensstr. 28/30  
48149 Münster  
Germany  
hubert.koller@uni-muenster.de  
phone: +49 251 8323448  
FAX: +49 251 8323409

Table S1: unit cell parameters of calcined samples after exchange reaction at 448 K

| time / d | a / Å | c / Å |
|----------|-------|-------|
| 0        | 12,25 | 26,15 |
| 1        | 12,36 | 26,21 |
| 2        | 12,41 | 26,25 |
| 3        | 12,40 | 26,28 |
| 4        | 12,43 | 26,28 |
| 5        | 12,45 | 26,35 |
| 6        | 12,46 | 26,32 |
| 7        | 12,38 | 26,22 |

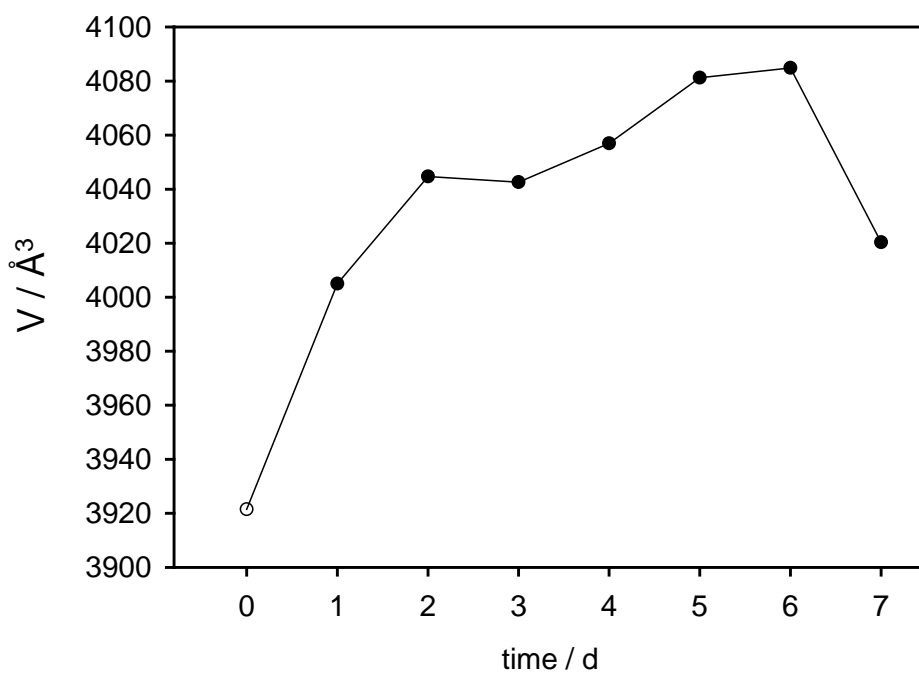

Fig. S1: unit cell volume of calcined samples after exchange reaction at 448 K

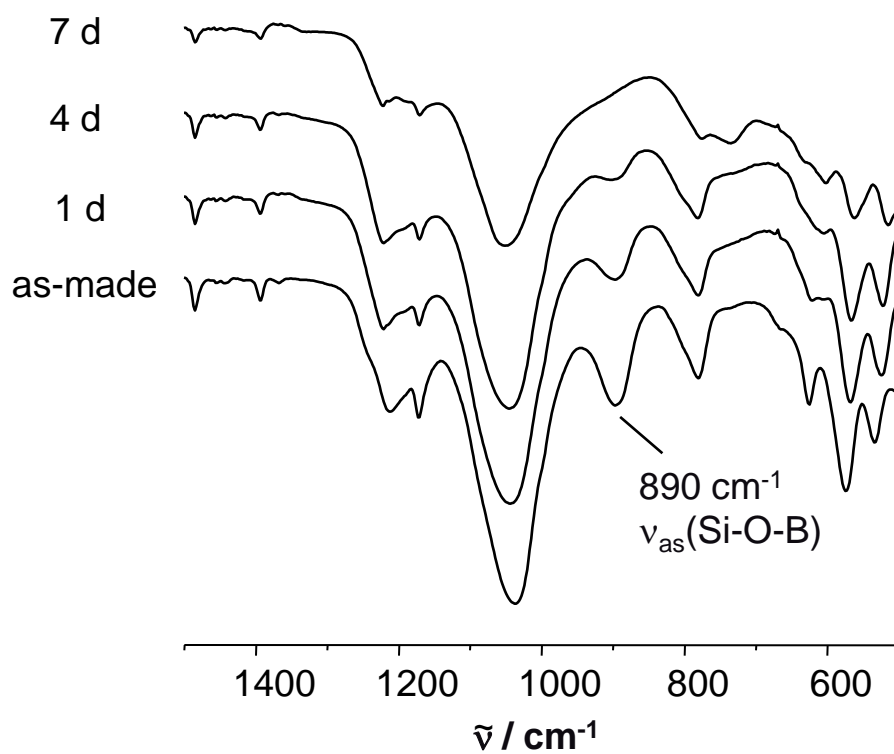

Fig. S2: IR spectra of as-made zeolite B-Beta and of the sample treated for various days at 448 K in 1M  $\text{Al}(\text{NO}_3)_3$

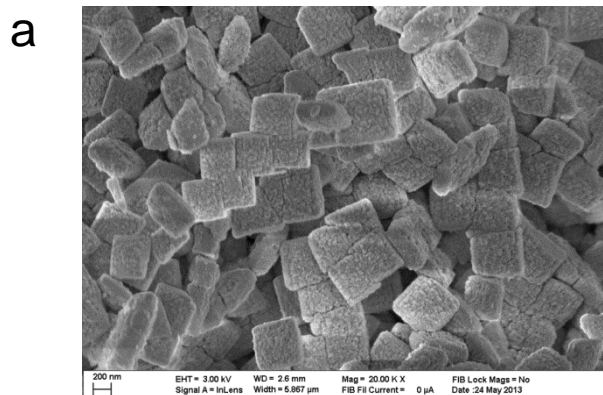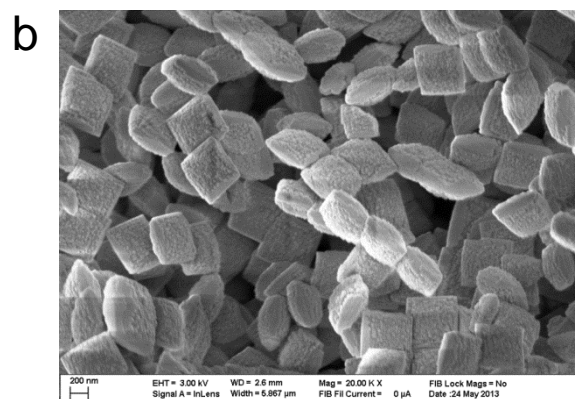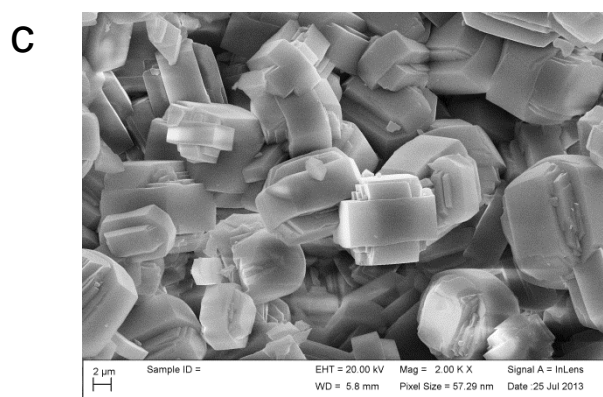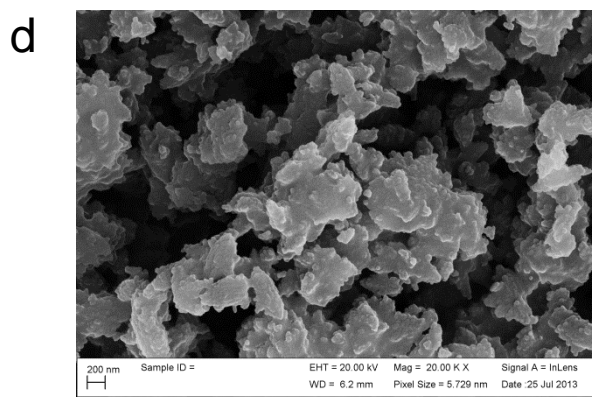

Fig. S3: SEM data of (a) as-made B-Beta and (b) the sample after 7 days of treatment in  $\text{Al}(\text{NO}_3)_3$  solution; (c)  $\text{TPA}^+\text{-B-ZSM-5}$ ; (d)  $\text{DDB-B-ZSM-12}$

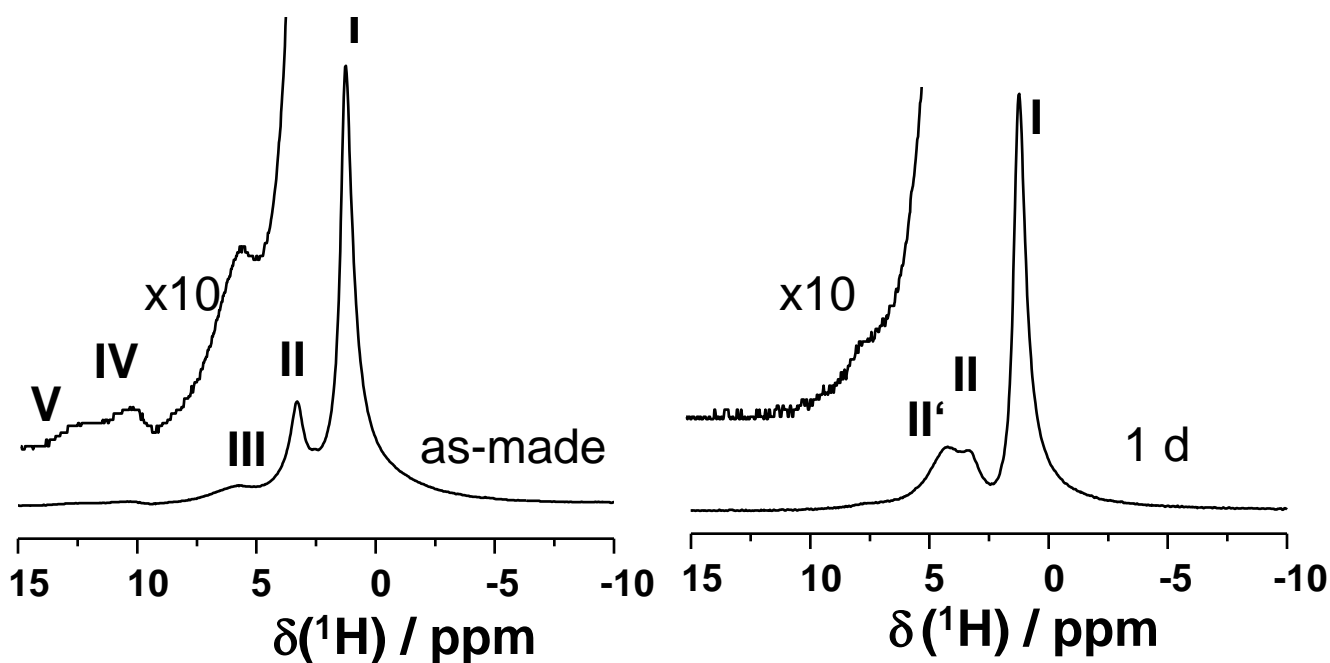

Fig. S4:  $^1\text{H}$  MAS NMR spectra of as-made B-Beta and the sample after 1 days of treatment in  $\text{Al}(\text{NO}_3)_3$  solution; lines I ( $\text{CH}_3$ ) and II ( $\text{CH}_2$  near B) and II' ( $\text{CH}_2$  near Al) are from  $\text{TEA}^+$  cations, line II is from water and/or weakly hydrogen-bonded defect silanol groups; lines IV and V are the well-known  $^1\text{H}$  signals in hydrogen-bonded defect silanol groups in charge-compensating defect sites

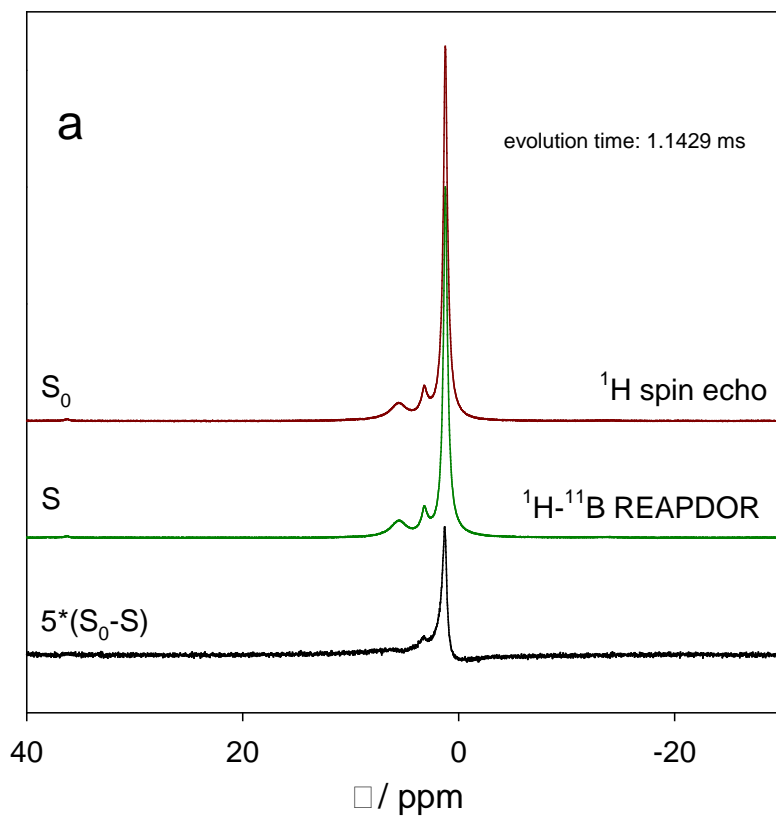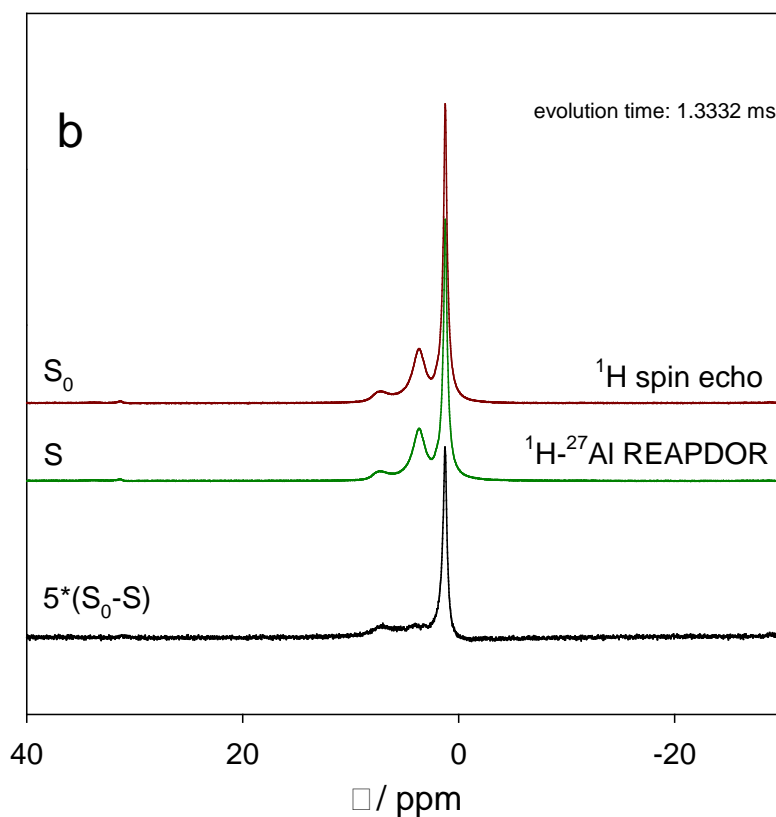

Fig. S5: (a)  $^1\text{H}$ - $^{11}\text{B}$  REAPDOR experimental spectra of  $\text{TEA}^+\text{-B-Beta}$ , and (b)  $^1\text{H}$ - $^{27}\text{Al}$  REAPDOR of the sample treated for 6 d in  $\text{Al}(\text{NO}_3)_3$  solution at 448 K

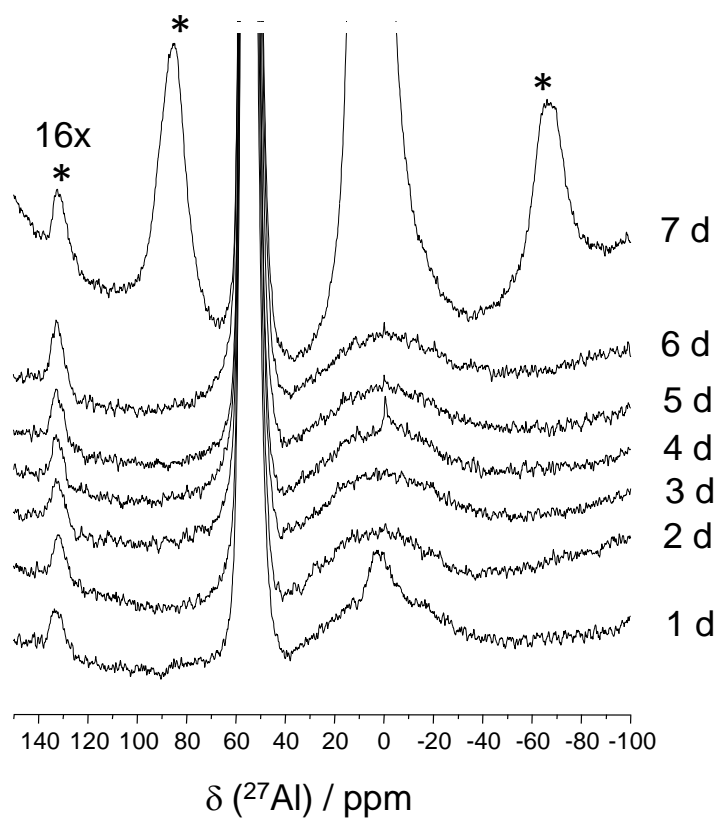

Fig. S6:  $^{27}\text{Al}$  MAS NMR of zeolite B-Beta samples treated for various days at 448 K in  $1\text{M Al}(\text{NO}_3)_3$  (\* are spinning sidebands); intensity scales are increased by a factor of 16 compared to Fig. 3

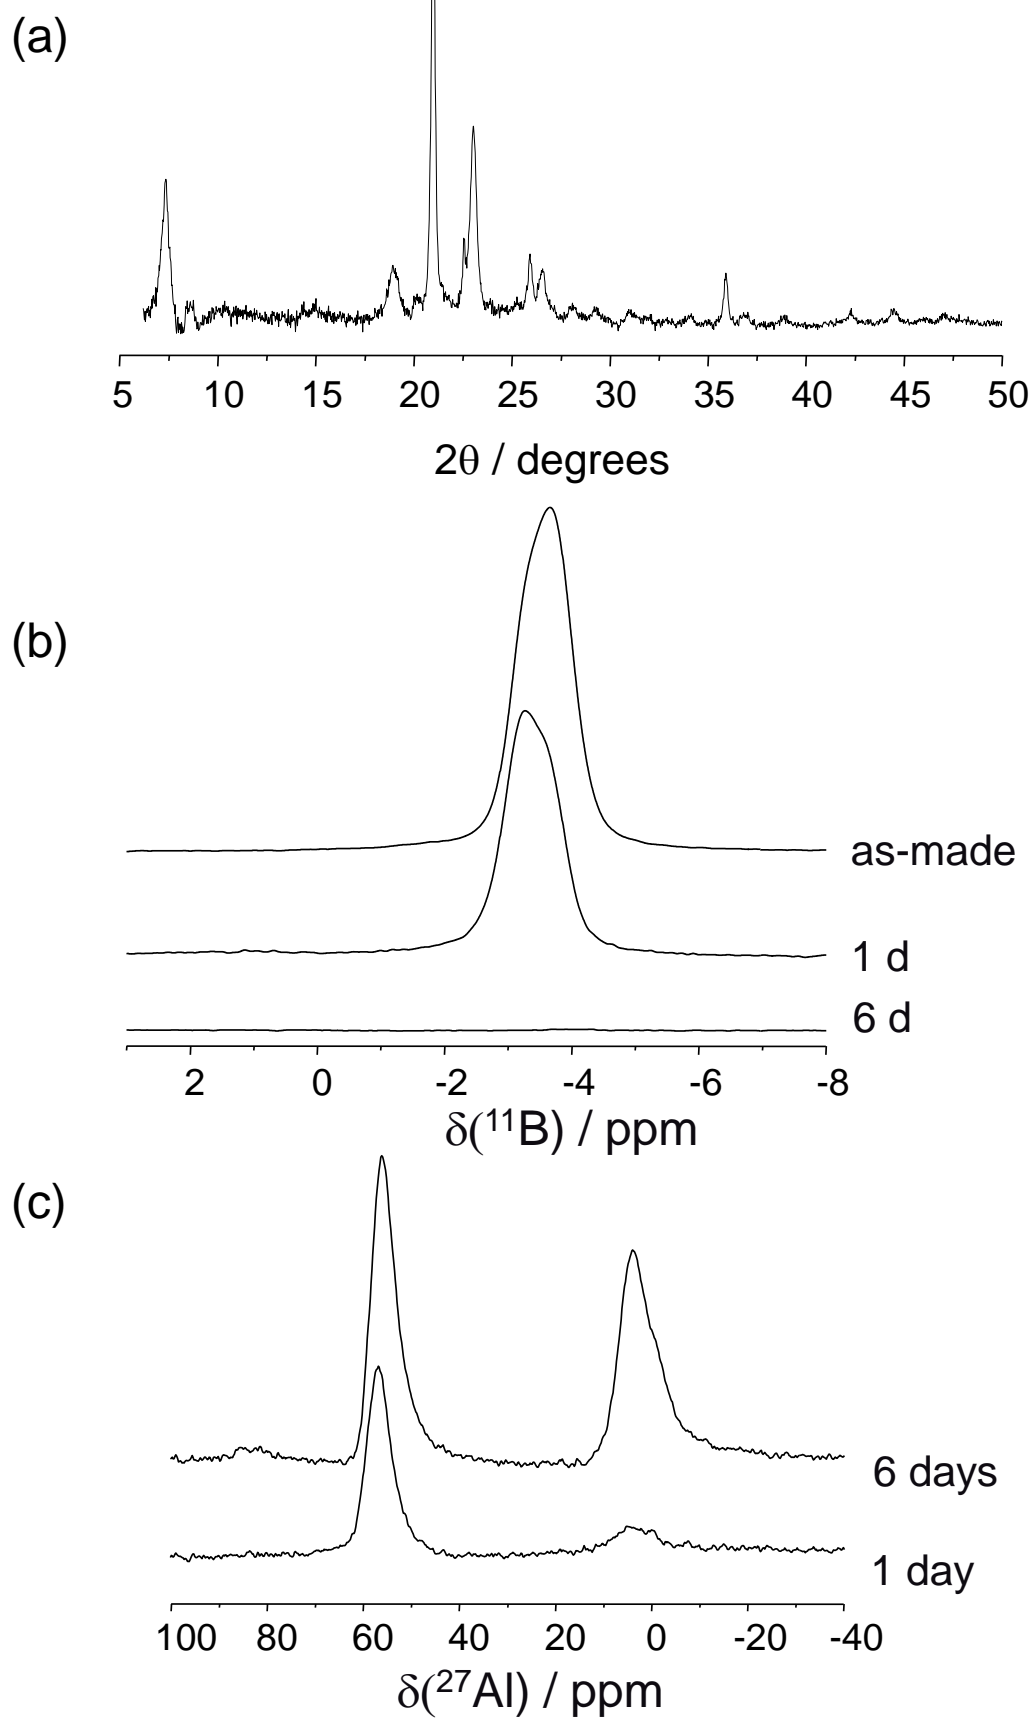

Fig. S7: (a) XRD powder pattern of as-made B-ZSM-12; (b)  $^{11}\text{B}$  MAS NMR of as-made sample and samples treated for 1d and 6d; (c)  $^{27}\text{Al}$  MAS NMR of samples treated for 1d and 6d
